# Supplementary figures and images for: The small molecule phenamil is a modulator of adipocyte differentiation and PPARγ expression
Source: PubMed Central journal article supplement — J Lipid Res. 2010 Sep;51(9):2775–84. doi: 10.1194/jlr.M008490 (PMC2918460; doi:10.1194/jlr.m008490), 2010-09

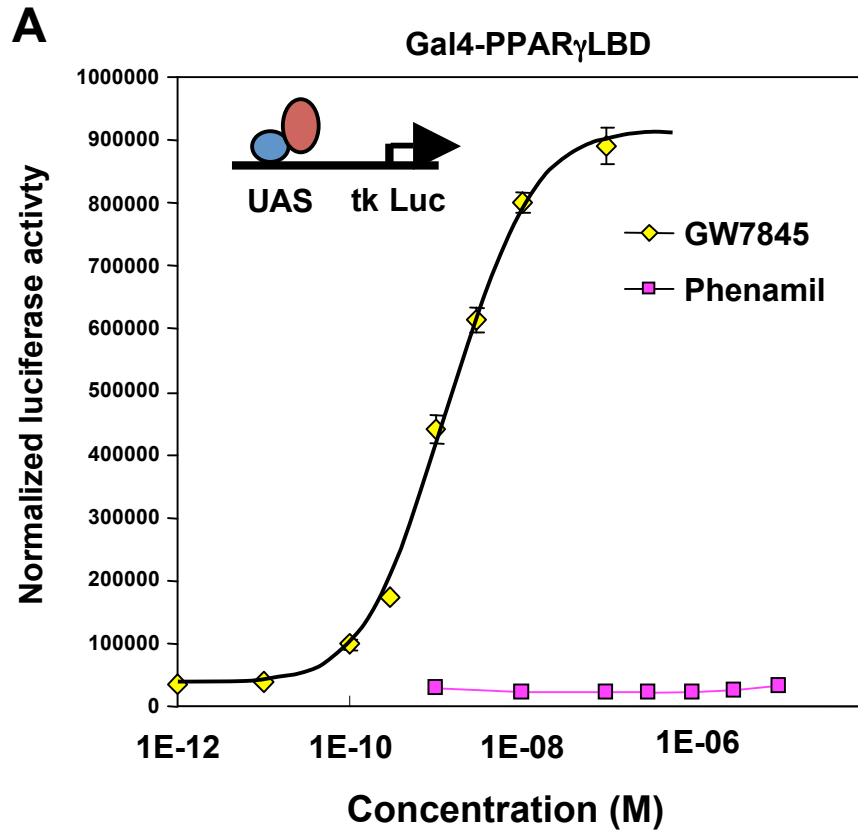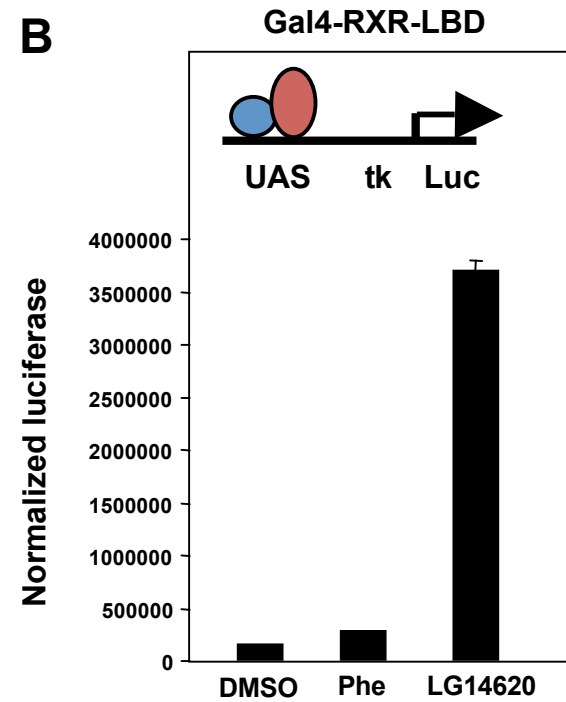

**A**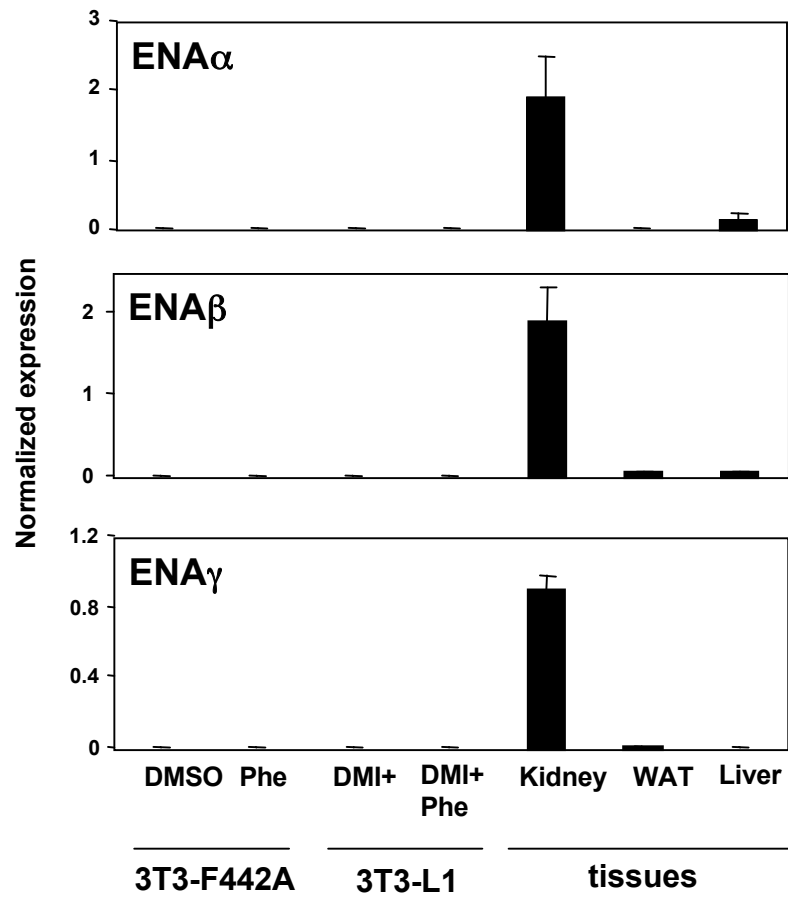**B**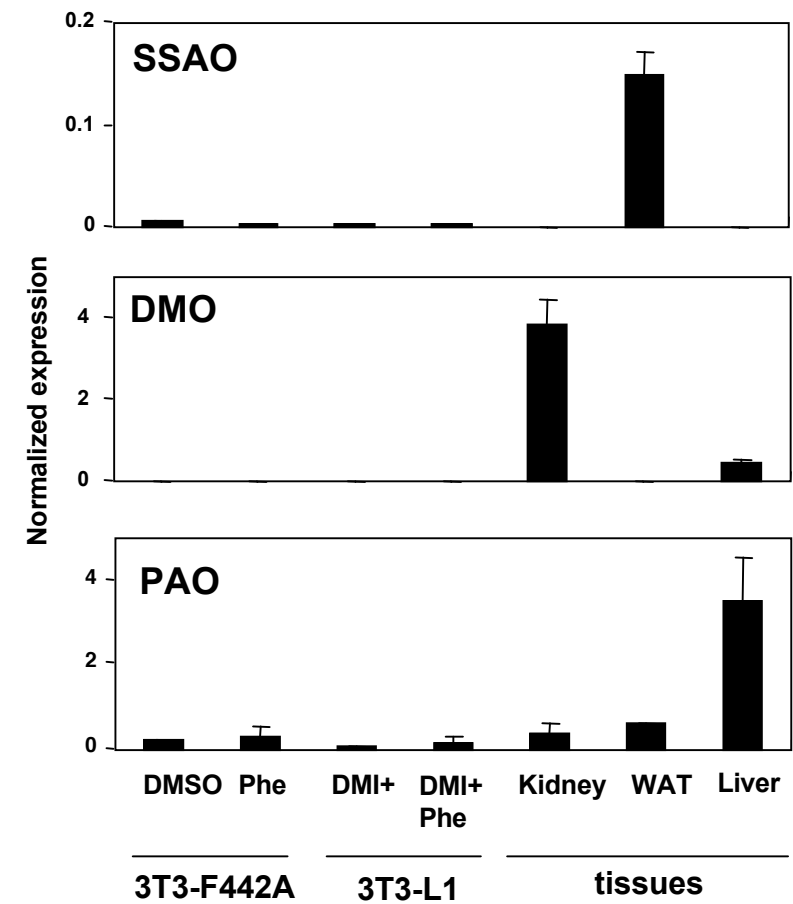

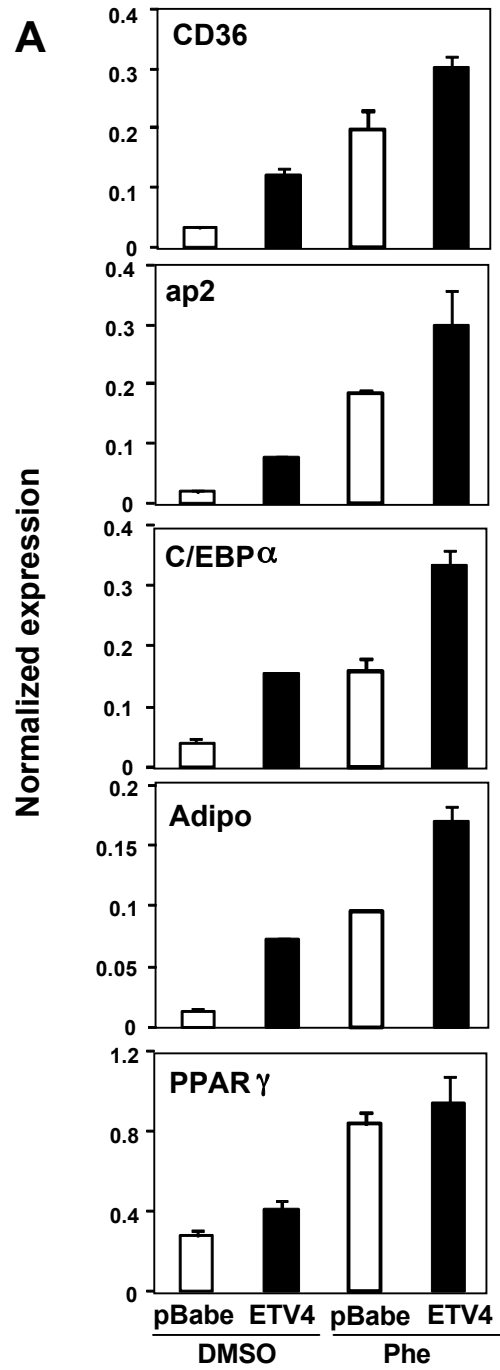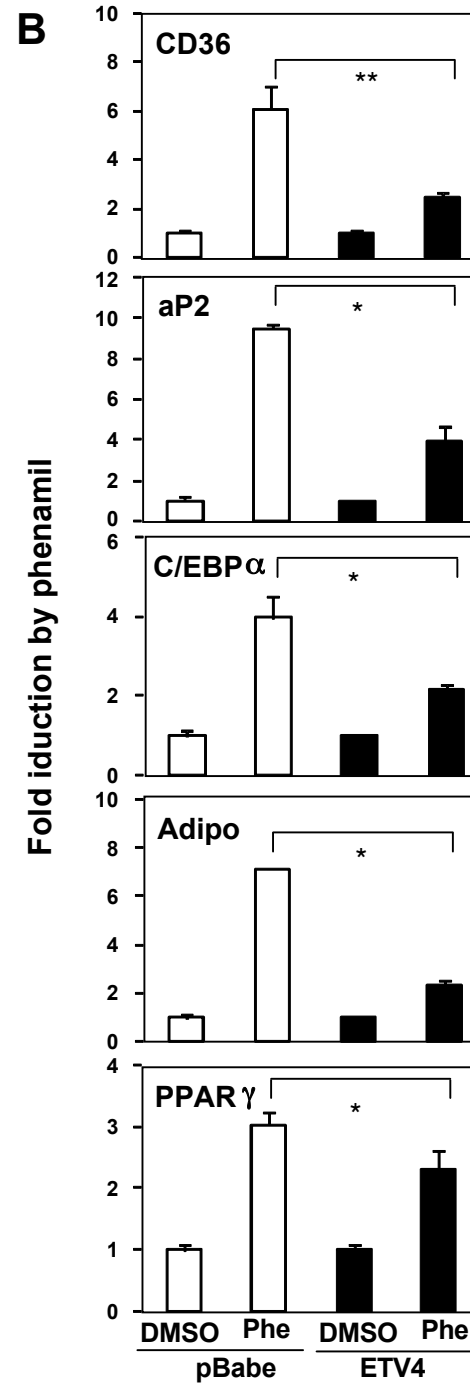

**A**

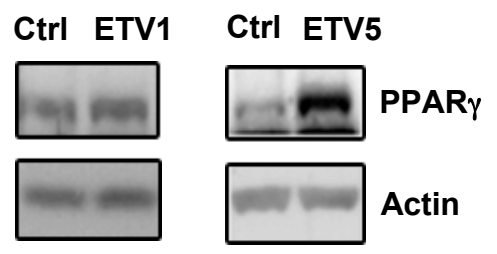

**B**

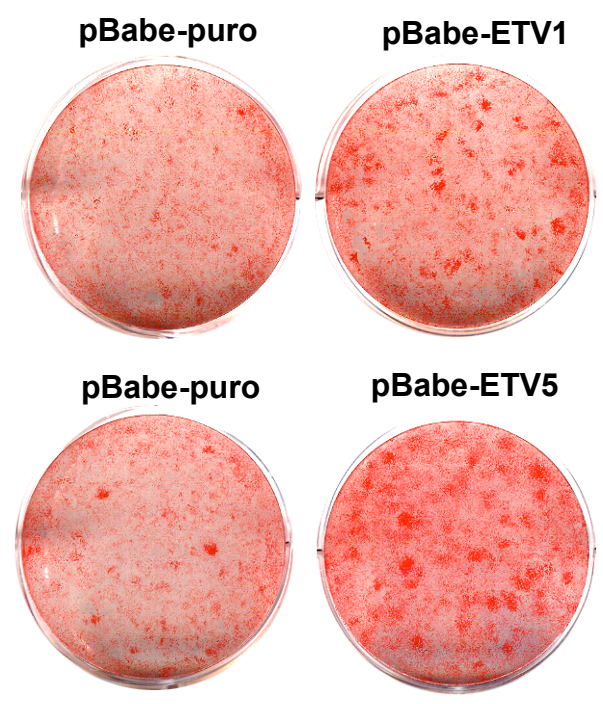

Supplement: supp_M008490_JLR_suppdata.pdf [file supp_M008490_JLR_suppdata.pdf]
